# Supplementary material
Source: PubMed Central journal article supplement (PMC3261755)

Suppl Fig 1.

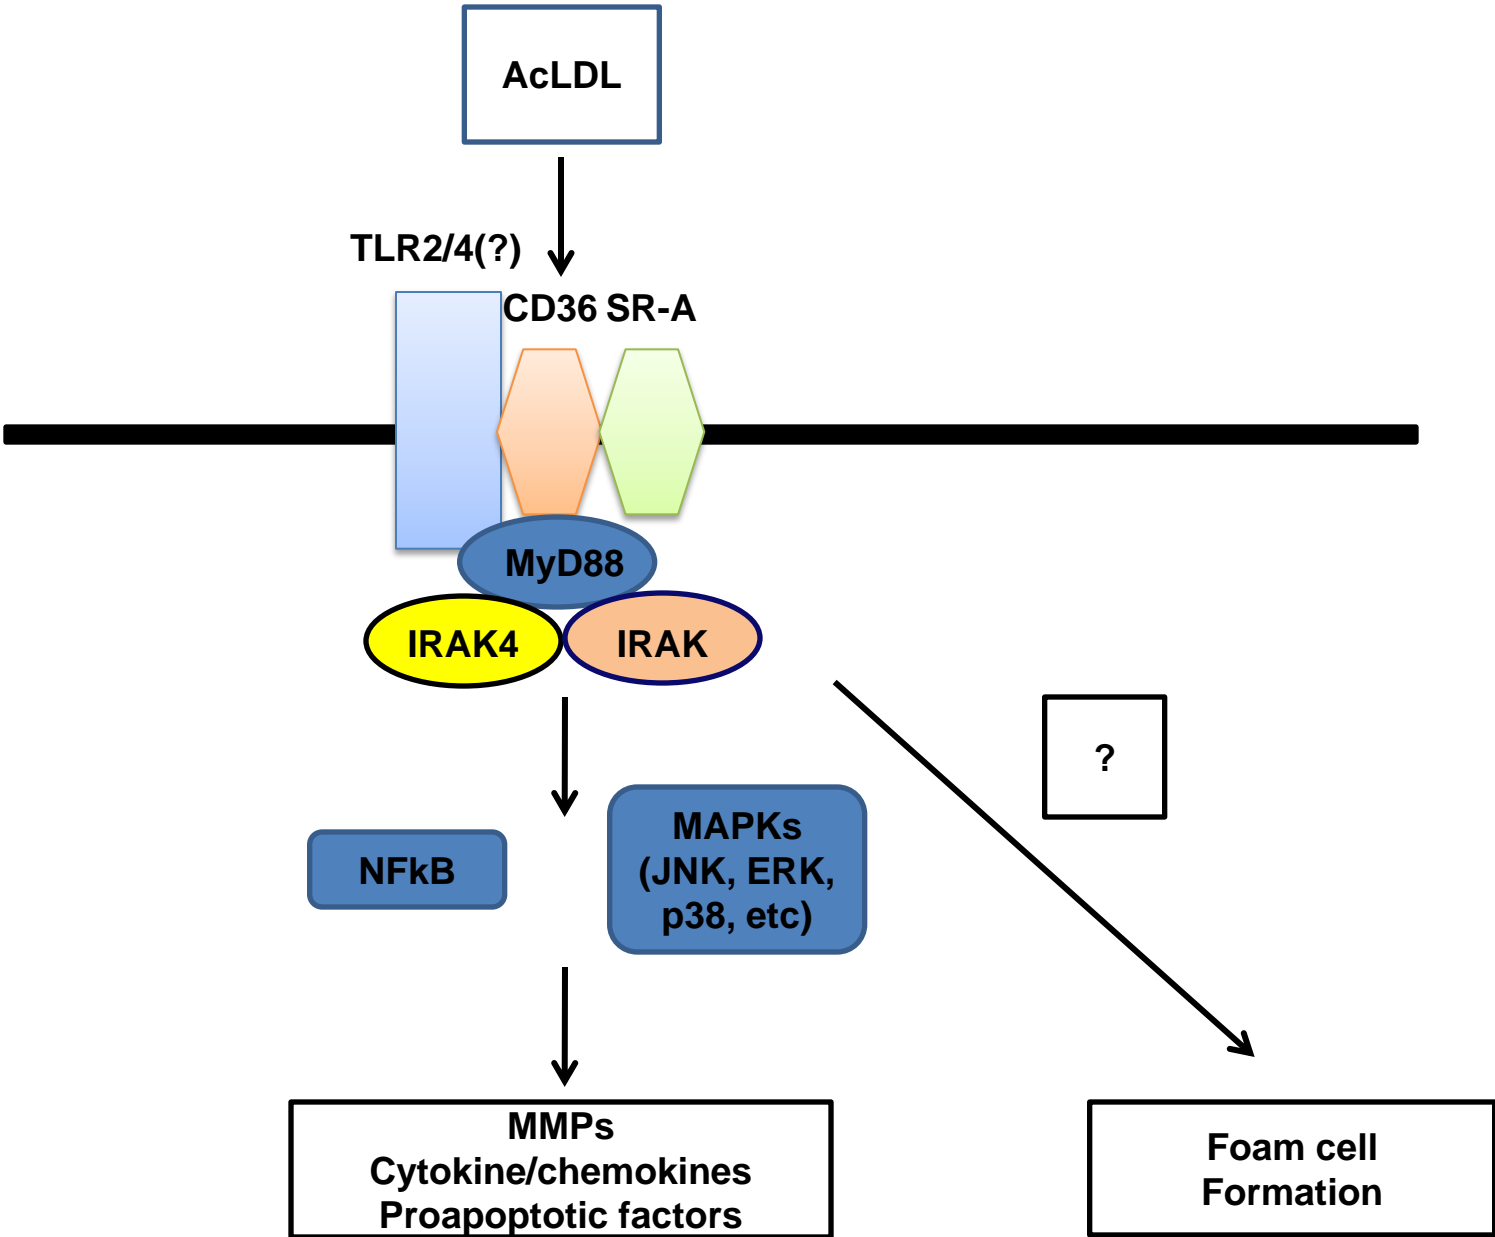

Suppl. Fig 2

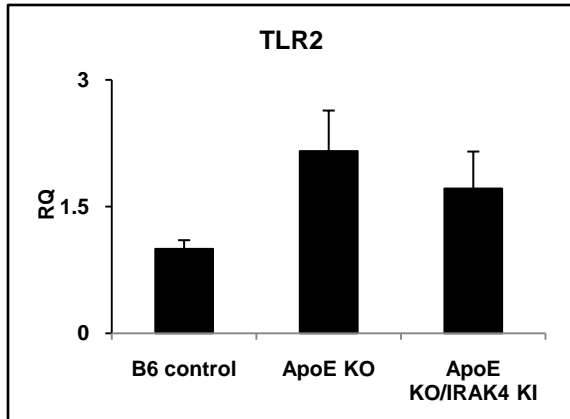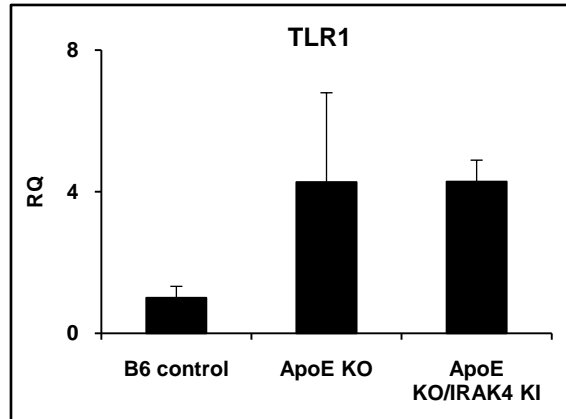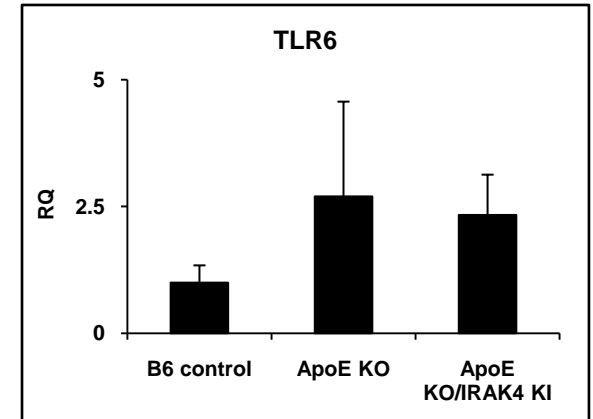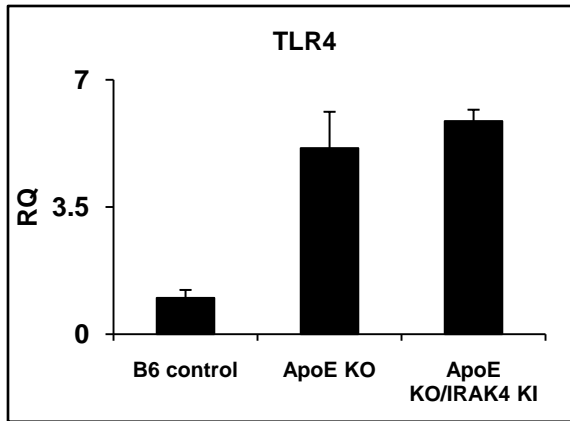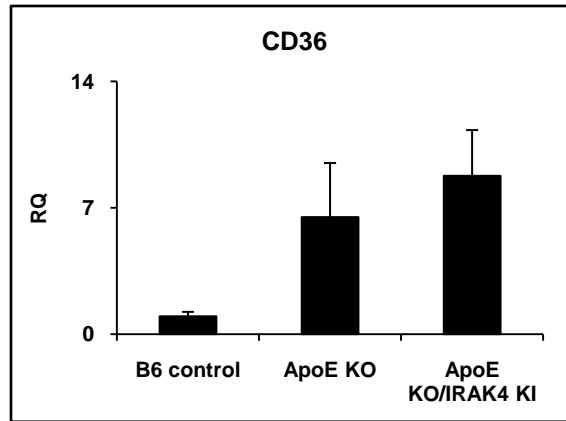

Supplement: NIHMS340959-supplement-Supplemental_figs.pdf [file NIHMS340959-supplement-Supplemental_figs.pdf]
